1 **From Armament to Ornament: Performance Trade-Offs in the Sexual Weaponry of**  
2 **Neotropical Electric Fishes**

3 **Kory M. Evans<sup>1</sup>; Maxwell J. Bernt<sup>2</sup>; Matthew A. Kolmann<sup>3</sup> Kassandra L. Ford<sup>2</sup>, James S.**  
4 **Albert<sup>2</sup>**

5 Key Words: Static allometry, Biomechanics, Geometric Morphometrics, Gymnotiformes

6 Biomechanics

7 Running Head: Sexual weaponry in electric fishes

8 <sup>1</sup>University of Minnesota, Department of Fisheries, Wildlife, and Conservation Biology, & Bell  
9 Museum of Natural History, 1987 Upper Buford Circle, St. Paul, MN 55108, USA.

10 jacksonk@umn.edu (KME) (corresponding author).

11 <sup>2</sup>University of Louisiana at Lafayette, Department of Biology, P.O. Box 42451, Lafayette, LA  
12 70504, USA, (maxwell.bernt@louisiana.edu) (MJB), klf8880@louisiana.edu  
13 (KLF), jalbert@louisiana.edu (JSA).

14 <sup>3</sup>University of Washington, Friday Harbor Laboratories, University of Washington, 620  
15 University Rd., Friday Harbor, WA 98250, USA, kolmann@UW.edu (MAK).

16

17 **Abstract:** The evolution of sexual weaponry is thought to have marked effects on the underlying  
18 static allometry that builds them. These weapons can negatively affect organismal survivability  
19 by creating trade-offs between trait size and performance. Here we use three-dimensional  
20 geometric morphometrics to study the static allometry of two species of sexually dimorphic  
21 electric fishes (*Apteronotus rostratus* and *Compsaraia samueli*) in which mature males grow  
22 elongate jaws used in agonistic male-male interactions. We quantify jaw mechanical advantage  
23 between the sexes of both species to track changes in velocity and force transmission associated  
24 with the development of sexual weaponry. We find evidence for trade-offs between skull shape  
25 and mechanical advantage in *C. samueli*, where males with longer faces exhibit lower  
26 mechanical advantages, suggesting weaker bite forces. In contrast, males, and females of *A.*  
27 *rostratus* exhibit no difference in mechanical advantage associated with facial elongation. We  
28 hypothesize that differences in the functionality of the sexual weaponry between the two species  
29 may drive divergences in the allometric scaling of mechanical advantage.

30 **Key words:** Sexual dimorphism, Sexual selection, Geometric morphometrics, Gymnotiformes,  
31 Biomechanics.

32

### 33 **Background**

34 Sexually-selected traits used as weapons in competition for resources, and ultimately access to  
35 mates, have evolved multiple times across the tree of life, and have produced a diversity of  
36 elaborate phenotypes [1]. These weapons are most often used to defend resources and settle  
37 conflicts between individuals through combat (armament) or display (ornament), and may also  
38 serve the additional purpose of providing honest signals to mates about viability [2, 3]. Sexual  
39 weaponry may also result in trade-offs between the size of a weapon and performance thus  
40 limiting the potential range of phenotypic disparity [4, 5]. Trade-offs also have marked effects on  
41 the underlying static allometries that build sexual weapons, such that differences in performance  
42 associated with increases in trait o size can influence the slope of a static allometry [6].

### 43 *Study System*

44 Neotropical electric fishes (Gymnotiformes: Teleostei) represent an excellent case study for  
45 sexual weaponry. In this clade, fishes exhibit a wide diversity of skull shapes ranging from  
46 highly foreshortened skull shapes to highly elongate skull shapes [7, 8]. Amongst this diversity is  
47 an interesting pattern of sexual dimorphism, where males grow elongate snouts and oral jaws for  
48 use in agonistic jaw-locking battles, a trait that has evolved multiple times independently [9-11]  
49 (Figure S1; Movie 1).

50 Facial elongation of sexually dimorphic males presents an interesting case for the study of trade-  
51 offs in jaw biomechanics. The typical teleost jaw is an integrated system of levers and linkages  
52 that control the opening and closing of the jaws in feeding and other activities [12, 13]. There is  
53 an extensive literature that documents the biomechanical effects of changes in jaw lever lengths  
54 and the resulting functional consequences for performance [14-16]. The elongation of the snout

55 and oral jaws in sexually dimorphic electric fishes may therefore result in trade-offs in jaw  
56 performance, as the lengths of jaw levers vary ontogenetically between the sexes.

57 Here we use three-dimensional geometric morphometrics to study the static allometry of sexually  
58 dimorphic phenotypes in two species of apteronotid electric fishes: *Apteronotus rostratus* and  
59 *Compsaraia samueli*, both of which exhibit independently-evolved craniofacial weaponry in  
60 males, and track ontogenetic trade-offs in mechanical advantage between the sexes in each  
61 species.

## 62 **Materials and Methods**

### 63 *Specimen selection and preparation*

64 For *Apteronotus* a total of 31 (12 male and 19 female) specimens were collected in the Chepo  
65 region of Panama (December-March 2016) using dip nets. To increase sample size, specimens  
66 collected in the field during this period were pooled with 26 museum specimens (five males, 21  
67 females) from the Smithsonian Tropical Research Institute (STRI) collected from nearby (<20  
68 km).

69 For *Compsaraia samueli*, a total of 49 (26 male and 23 female) specimens were collected from  
70 the area near Iquitos, Peru (August 2015-January 2017) using purse seines. Specimens of both  
71 species were dissected, and gonads inspected to determine sex (Table S1).

### 72 *Micro-CT scanning*

73 We used micro-CT scanning to capture the osteological properties of individuals in three-  
74 dimensions. For *A. rostratus*, a size series of 30 specimens (49-212 mm TL) was scanned at the  
75 University of Texas, Austin (UT) using a custom-built scanner by North Star Imaging (NSI) at

76 180 kV, 114-115 uA and 19-49  $\mu\text{m}$  voxel size. The remaining 27 specimens were scanned at the  
77 University of Washington Friday Harbor Labs (UW) Karl Liem Memorial Bio-Imaging Facility  
78 in conjunction with the “ScanAllFishes” project using a Bruker Skyscan 1173 at 70 kV, 114 uA  
79 and 28.2  $\mu\text{m}$  voxel size. For *C. samueli*, a size series of 49 specimens (67-194 mm TL) were  
80 scanned at (UW) at 65-70 kV, 114-123 uA, 24-35.7  $\mu\text{m}$  voxel size, 1175-1200 ms exposure, and  
81 a CCD sensitivity of 2240 x 2240 pixels. All micro-CT scans of both species are freely available  
82 for download from Open Science Framework © at [osf.io/m8tqe](https://osf.io/m8tqe).

### 83 ***Three-dimensional Geometric Morphometrics***

84 To study the ontogenetic shape change of the neurocranium between sexes of the two species, we  
85 used three-dimensional geometric morphometrics. Micro-CT image stacks were imported into  
86 Stratovan Checkpoint© and converted to three-dimensional isosurfaces. Isosurfaces were  
87 digitized with 34 landmarks (LM)(13 bilaterally symmetrical) (Figure 1a-c:Table S2) and  
88 exported to *MorphoJ* [17] for subsequent statistical analysis.

### 89 ***Mechanical Advantage***

90 We estimate velocity and force transmission of the lower jaw using closing mechanical  
91 advantage (MA). MA is quantified as the ratio between the closing in-lever distance (distance  
92 between the insertion of the adductor mandibulae muscle and the articulation of the jaw joint)  
93 and out-lever distance (distance between jaw joint and most anterior tooth) [13], such that  $MA =$   
94  $iL/oL$  (Figure 1d). To determine the precise area of muscle insertion on the lower jaw, one  
95 representative specimen of each species was dissected to reveal the underlying area of insertion.  
96 Here we study the ontogenetic scaling of log-transformed MA with log-transformed body-size  
97 and skull shape in male and female specimens of *A. rostratus* and *C. samueli* to test for

98 differences in slopes between sexes in each species and identify potential performance trade-offs  
99 associated with facial elongation.

### 100 *Neurocranial Allometric Trajectories*

101 To remove the effect of differential scaling and orientation, a full Procrustes superimposition was  
102 performed in *MorphoJ*. The Procrustes coordinates were then used to study the allometric  
103 relationship between skull shape and MA. Variation in allometric slopes between sexes was  
104 assessed in the R-package *Geomorph* [18] using the “procD.allometry” function. Allometric  
105 slopes are displayed using a predicted shape vs. MA regression [19].

### 106 *Video Recordings of Behavior*

107 Agonistic interactions between *C. samueli* males were filmed at the “Amazon Tropicals”  
108 aquarium store in Iquitos, Peru. Individuals were collected by aquarium fishermen and housed in  
109 40-gallon aquariums where they were filmed by the authors using a GoPro Hero 5© at 240 fps.  
110 Videos were rendered at 60 fps using Adobe Premier Pro Creative Cloud©.

## 111 **Results**

### 112 *Mechanical Advantage in Apteronotus rostratus*

113 No significant relationship was found between skull shape and MA in *A. rostratus* (Table 1;  
114 Figure 2a). Additionally, no significant interaction was found between MA and sex, indicating  
115 that males and females exhibit similar MA throughout the entirety of their ontogenies.

### 116 *Mechanical Advantage in Compsaraia samueli*

117 A significant relationship was found between skull shape and MA where males with longer faces  
118 exhibit lower MA and females the opposite pattern (Table 1; Figure 2b). A significant effect of  
119 sex on MA was also recovered, suggesting differing MA between sexes.

## 120 **Discussion**

### 121 *The performance cost of facial elongation differs among species*

122 Notable scaling differences in MA were observed among species. In *C. samueli*, skull shape in  
123 males is negatively correlated with MA while females exhibit an inverse pattern. This reduction  
124 suggests that sexually dimorphic males have weaker jaw-closing forces than females, suggesting  
125 a trade-off in male cranial morphology, whereby males with elongate faces used in jaw-locking  
126 combat sacrifice more forceful biting commensurate with shorter jaws. This pattern is contrasted  
127 with *A. rostratus*, which exhibit no differences in MA between males and females.

### 128 *Why the long face?*

129 Despite their exaggerated snout and jaws, male *C. samueli* have low MA jaws reaching as low as  
130 27% (vs. 40% in the lowest female). Fittingly, observations of their fighting behavior (Movie 1)  
131 demonstrate that combat rarely results in extensive damage. This is a common finding among  
132 studies of animal weaponry where the function of an exaggerated weapon is greatly diminished  
133 and instead functions as an assessment tool for conspecifics [20]. There are several alternative  
134 explanations for low MA jaws in *C. samueli*: (1) lower, MA may be selected for in this taxon.  
135 This suggests that these jaws could be used as a more exclusionary weapon [21]. Observations  
136 show fighting *C. samueli* males facing each other head-on (Movie 1), without any obvious  
137 rolling or twisting, but instead pushing each other linearly in a contest more analogous to sumo-

138 wrestling or tug-of-war, where opponents are pushed or pulled off-balance around a central  
139 arena.

140 (2) Hypermorphic jaws could reflect increasing ritualization of the structure, suggesting jaws are  
141 more ornamental and less useful as a functional weapon. Exaggerated features are typical of  
142 high-quality males, and serve as a clear signal to rivals that their competitor is robust, capable of  
143 defending a resource, and not worth fighting with. Facial elongation also results in the increase  
144 in absolute body-length of these and may be made obvious through electric organ discharge by  
145 increasing the distance between dipoles.

## 146 **Conclusions**

147 Differences in the mechanical advantage of convergent sexual weaponry between these two  
148 species reflects a functional gradient between armament and ornamentation that is seen across  
149 other taxa. In *A. rostratus*, males retain a fully functional lower jaw throughout ontogenetic skull  
150 elongation. The opposite pattern is observed in *C. samueli* males where the mechanical  
151 advantage of the lower jaw is dramatically reduced resulting in a less functional weapon but  
152 perhaps a more appealing or ritualized ornament for conspecific signaling.

## 153 **Acknowledgments**

154 We thank Brandon Waltz, Eric Hilton, Andrew Simons and William Crampton for discussions  
155 about sexual dimorphism Adam Summers and #scanAllFishes project allowed us to scan  
156 specimens for free.

## 157 **Funding**



158 This work was supported by United States National Science Foundation awards DEB 0614334,  
159 0741450, and 1354511 to JSA and University of Minnesota, College of Agricultural and Natural  
160 Resource Sciences development funds to KME.

#### 161 **Ethics**

162 Fieldwork: IACUC 2016-0325-2019

#### 163 **Data Accessibility**

164 Shape data with script available on Dryad: doi:10.5061/dryad.mh911

#### 165 **Competing Interests**

166 We have no competing interests.

#### 167 **Author Contributions**

168 KME wrote the manuscript, collected specimens and took shape measurements. MJB assisted  
169 with specimen collection and scanning. MAK assisted with data interpretation and scanning.  
170 KLF filmed specimens in Peru and assisted in CT specimens. JSA reviewed the manuscript and  
171 assisted in data interpretation.

#### 172 **Literature Cited**

173 [1] Emlen, D.J., Warren, I.A., Johns, A., Dworkin, I. & Lavine, L.C. 2012 A mechanism of  
174 extreme growth and reliable signaling in sexually selected ornaments and weapons. *Science* **337**,  
175 860-864.

176 [2] Berglund, A., Bisazza, A. & Pilastro, A. 1996 Armaments and ornaments: an evolutionary  
177 explanation of traits of dual utility. *Biological Journal of the Linnean Society* **58**, 385-399.

- 178 [3] Emlen, D.J. 2008 The evolution of animal weapons. *Annual Review of Ecology, Evolution,*  
179 *and Systematics* **39**, 387-413.
- 180 [4] Zahavi, A. 1975 Mate selection—a selection for a handicap. *Journal of theoretical Biology*  
181 **53**, 205-214.
- 182 [5] Gustafsson, L., Qvarnström, A. & Sheldon, B.C. 1995 Trade-offs between life-history traits  
183 and a secondary sexual character in male collared flycatchers. *Nature* **375**, 311-313.
- 184 [6] Bonduriansky, R. & Day, T. 2003 The evolution of static allometry in sexually selected traits.  
185 *Evolution* **57**, 2450-2458.
- 186 [7] Evans, K.M., Waltz, B.T., Tagliacollo, V.A., Sidlauskas, B.L. & Albert, J.S. 2017  
187 Fluctuations in Evolutionary Integration Allow for Big Brains and Disparate Faces. *Scientific*  
188 *Reports* **7**, 40431. (doi:10.1038/srep40431  
189 <http://www.nature.com/articles/srep40431#supplementary-information>).
- 190 [8] Evans, K.M., Waltz, B., Tagliacollo, V., Chakrabarty, P. & Albert, J.S. 2017 Why the short  
191 face? Developmental disintegration of the neurocranium drives convergent evolution in  
192 neotropical electric fishes. *Ecology and Evolution* **7**, 1783-1801.
- 193 [9] Hilton, E.J., Fernandes, C.C. & Armbruster, J. 2006 Sexual dimorphism in *Apteronotus*  
194 *bonapartii* (Gymnotiformes: Apteronotidae). *Copeia* **2006**, 826-833.
- 195 [10] Albert, J.S. & Crampton, W.G. 2009 A new species of electric knifefish, genus *Compsaraia*  
196 (Gymnotiformes: Apteronotidae) from the Amazon River, with extreme sexual dimorphism in  
197 snout and jaw length. *Systematics and Biodiversity* **7**, 81-92.
- 198 [11] Tagliacollo, V.A., Bernt, M.J., Craig, J.M., Oliveira, C. & Albert, J.S. 2016 Model-based  
199 total evidence phylogeny of Neotropical electric knifefishes (Teleostei, Gymnotiformes).  
200 *Molecular phylogenetics and evolution* **95**, 20-33.

- 201 [12] Westneat, M.W. 2003 A biomechanical model for analysis of muscle force, power output  
202 and lower jaw motion in fishes. *Journal of Theoretical Biology* **223**, 269-281.
- 203 [13] Westneat, M.W. 2004 Evolution of levers and linkages in the feeding mechanisms of fishes.  
204 *Integrative and Comparative Biology* **44**, 378-389.
- 205 [14] Grubich, J.R. 2005 Disparity between feeding performance and predicted muscle strength in  
206 the pharyngeal musculature of black drum, *Pogonias cromis* (Sciaenidae). *Environmental*  
207 *Biology of Fishes* **74**, 261-272.
- 208 [15] Hulsey, C.D., Fraser, G.J. & Streelman, J.T. 2005 Evolution and development of complex  
209 biomechanical systems: 300 million years of fish jaws. *Zebrafish* **2**, 243-257.
- 210 [16] Martinez, C.M. & Sparks, J.S. 2017 Malagasy cichlids differentially limit impacts of body  
211 shape evolution on oral jaw functional morphology. *Evolution*.
- 212 [17] Klingenberg, C.P. 2011 MorphoJ: an integrated software package for geometric  
213 morphometrics. *Molecular Ecology Resources* **11**, 353-357.
- 214 [18] Adams, D.C. & Otárola-Castillo, E. 2013 geomorph: an R package for the collection and  
215 analysis of geometric morphometric shape data. *Methods in Ecology and Evolution* **4**, 393-399.
- 216 [19] Adams, D.C. & Nistri, A. 2010 Ontogenetic convergence and evolution of foot morphology  
217 in European cave salamanders (Family: Plethodontidae). *BMC Evolutionary Biology* **10**, 1.
- 218 [20] Arai, H. & Sato, T. 2007 Prominent ornaments and rapid color change: use of horns as a  
219 social and reproductive signal in unicornfish (Acanthuridae: *Naso*). *Ichthyological Research* **54**,  
220 49-54.
- 221 [21] Goyens, J., Dirckx, J. & Aerts, P. 2015 Costly sexual dimorphism in *Cyclommatus*  
222 *metallifer* stag beetles. *Functional Ecology* **29**, 35-43.

223

224 **Table and Figure Captions**

225 **Figure 1.** CT scans of *Apteronotus rostratus* (ANSP 200222) in lateral (A), dorsal (B), ventral  
226 (C), and mandibular views showing three-dimensional landmarks for 34 (13 bilaterally  
227 symmetrical) landmarks used for the geometric morphometric analysis of *Compsaraia*  
228 *samueli* and *Apteronotus rostratus* and in-lever (iL) and out-lever (oL) measurements taken from  
229 the jaw joint (JJ).

230 **Figure 2.** Ontogenetic trajectories of lower jaw mechanical advantage vs predicted skull shape  
231 in *Apteronotus rostratus* (A) and *Compsaraia samueli* (B).

232 **Table 1.** Analysis of variance for the effect of skull shape and sex on mechanical advantage for  
233 *Apteronotus rostratus* and *Compsaraia samueli*. Bold values indicate statistical significance ( $p=$   
234  $< 0.05$ ).

235 **Movie 1.** Agonistic jaw-locking behavior between two captive male *Compsaraia samueli*  
236 specimens.

237

238

239

**Table 1.** Analysis of variance for the effect of skull shape and sex on mechanical advantage for *Apteronotus rostratus* and *Compsaraia samueli*. Bold values indicate statistical significance ( $p < 0.05$ ).

| <i>A. rostratus</i> | Df | Sum Sq | Mean Sq | F value | Pr(>F)       |
|---------------------|----|--------|---------|---------|--------------|
| shape               | 1  | 0.003  | 0.003   | 0.595   | 0.444        |
| sex                 | 1  | 0.016  | 0.016   | 3.592   | 0.064        |
| shape:sex           | 1  | 0.000  | 0.000   | 0.010   | 0.920        |
| Residuals           | 45 | 0.238  | 0.004   |         |              |
| <i>C. samueli</i>   | Df | Sum Sq | Mean Sq | F value | Pr(>F)       |
| shape               | 1  | 0.205  | 0.205   | 23.960  | <b>0.000</b> |
| sex                 | 1  | 0.065  | 0.065   | 7.590   | <b>0.008</b> |
| shape:sex           | 1  | 0.030  | 0.030   | 3.484   | 0.068        |
| Residuals           | 45 | 0.385  | 0.009   |         |              |

240

241

A

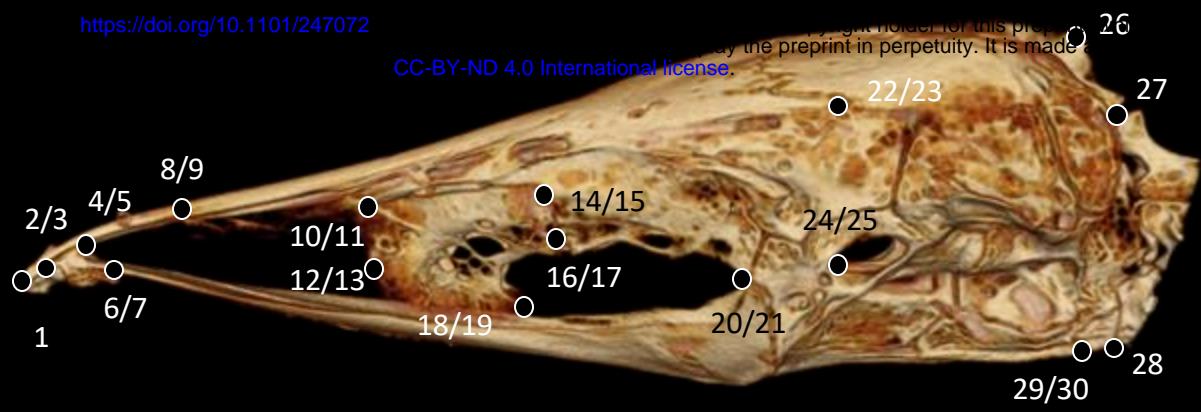

B

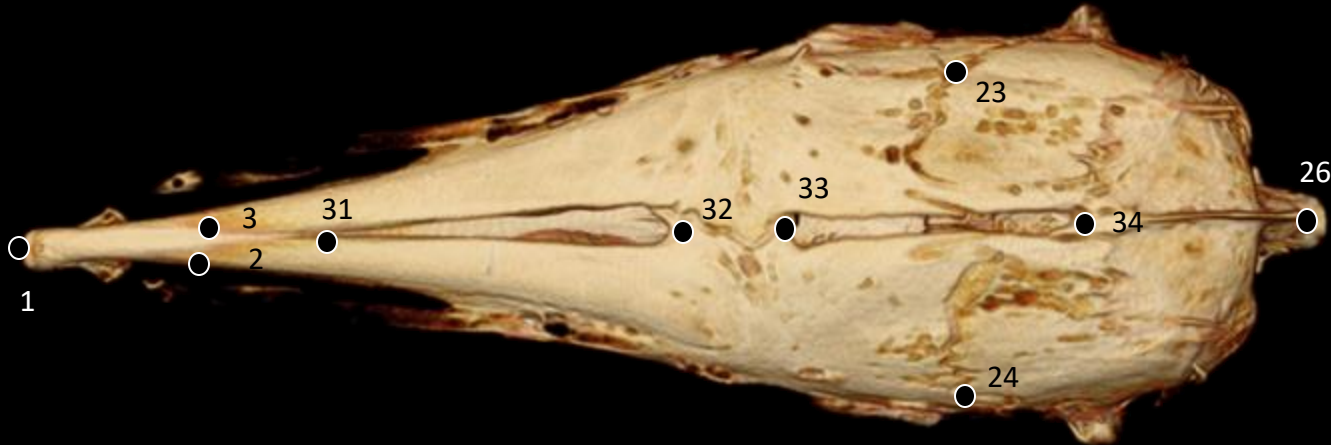

C

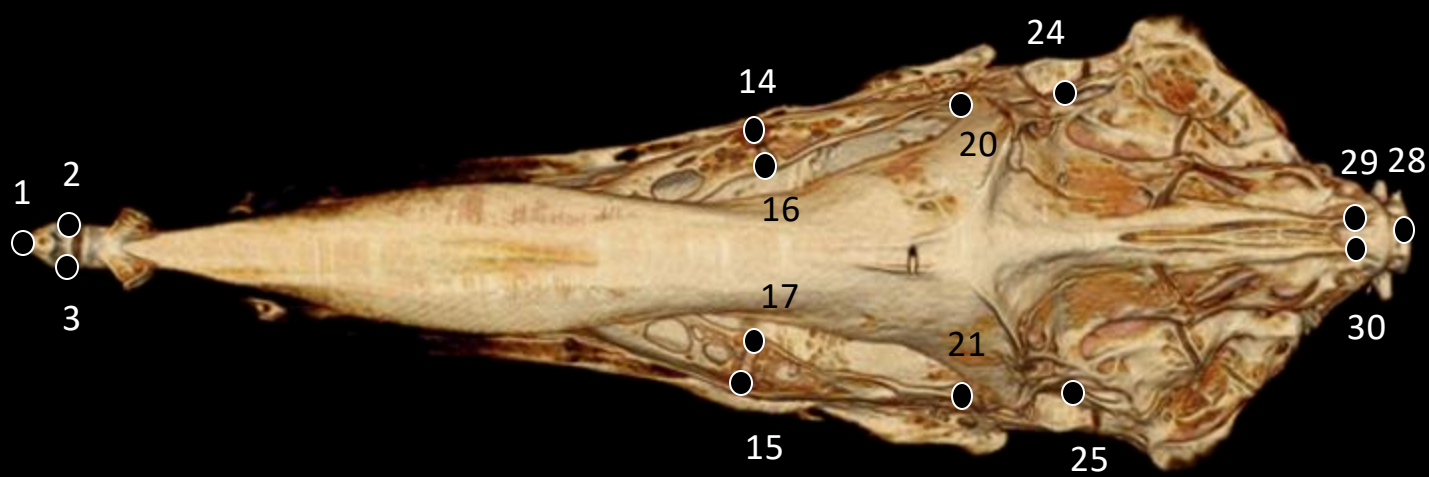

D

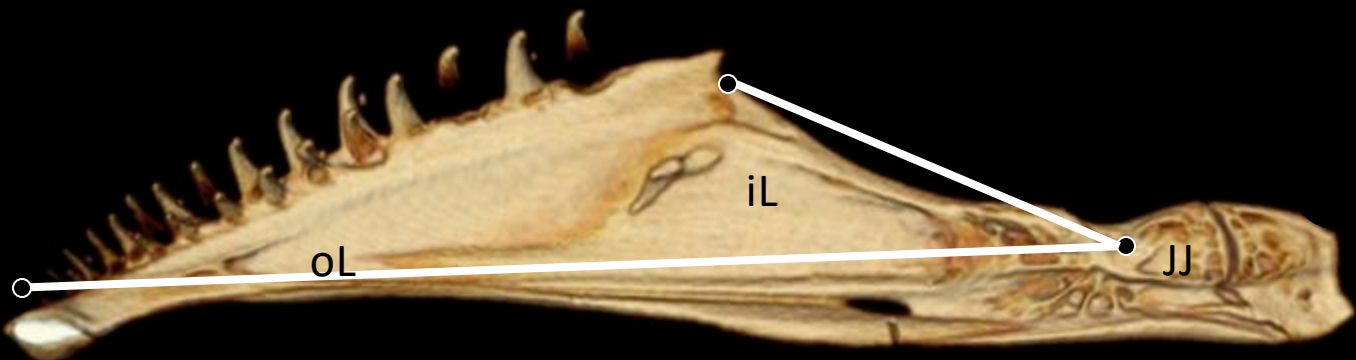

MA = iL/oL

A

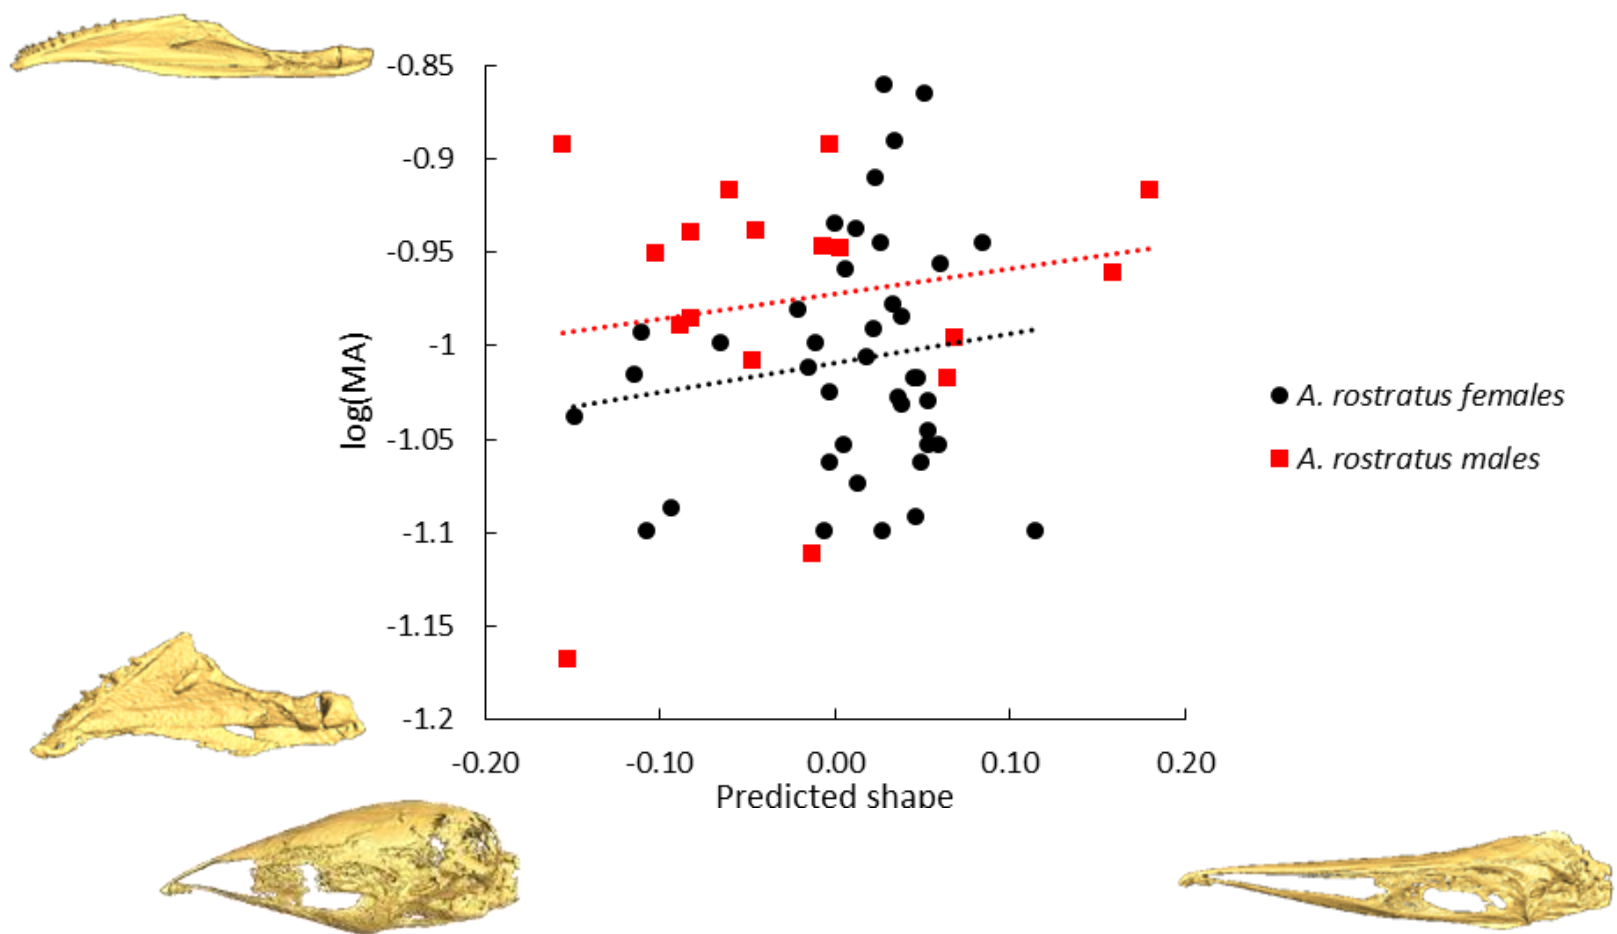

B

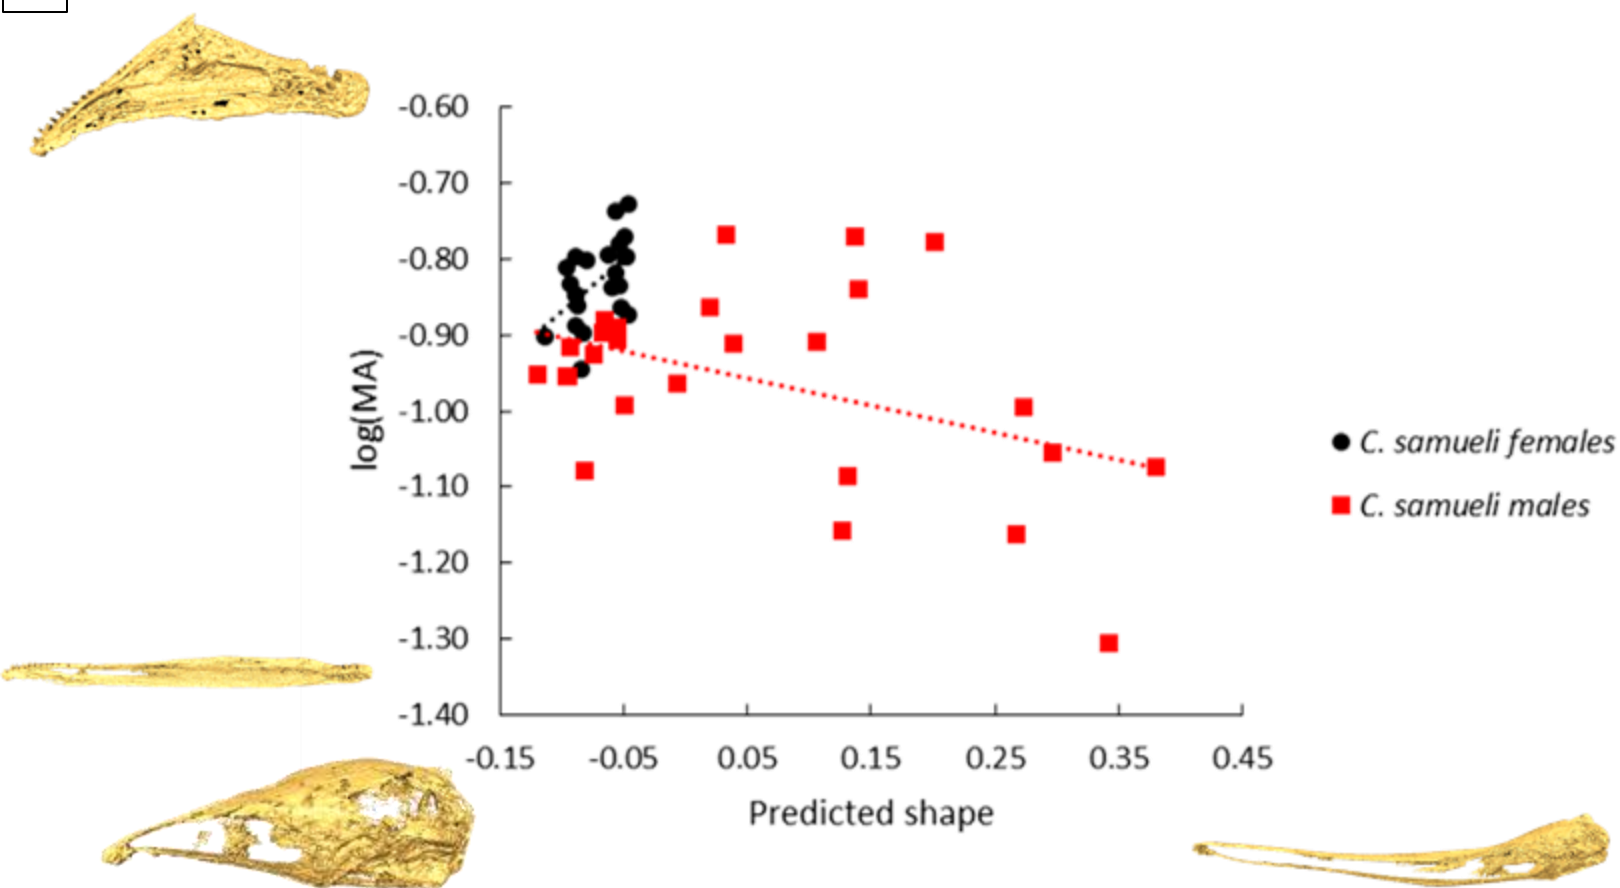

Source: https://www.biorxiv.org/content/10.1101/247072v1.full.pdf
